# Supplementary material
Source: MDPI journal article supplement (https://www.mdpi.com/2504-477X/3/2/48)
Supplement: s1 [file s1]

# Butyl Rubber-Based Composite: Thermal Degradation and Prediction of Service Lifetime

Phuong Nguyen-Tri <sup>1,\*</sup>, Ennouri Triki <sup>2</sup> and Tuan Anh Nguyen <sup>3</sup>

<sup>1</sup> Department of Chemistry, University of Montreal, Montreal, QC H3T 1J4, Canada

<sup>2</sup> Department of Mechanical Engineering, McGill University, Montreal, QC H3T 1E2, Canada; ennouri.triki@mail.mcgill.ca

<sup>3</sup> Institute for Tropical Technology, Vietnam Academy of Science and Technology (VAST), Hanoi 122100, Vietnam; ntanh2007@gmail.com

\* Correspondence: phuong.nguyen.tri@umontreal.ca; Tel.: +1-514-340-5121 (ext. 7326)

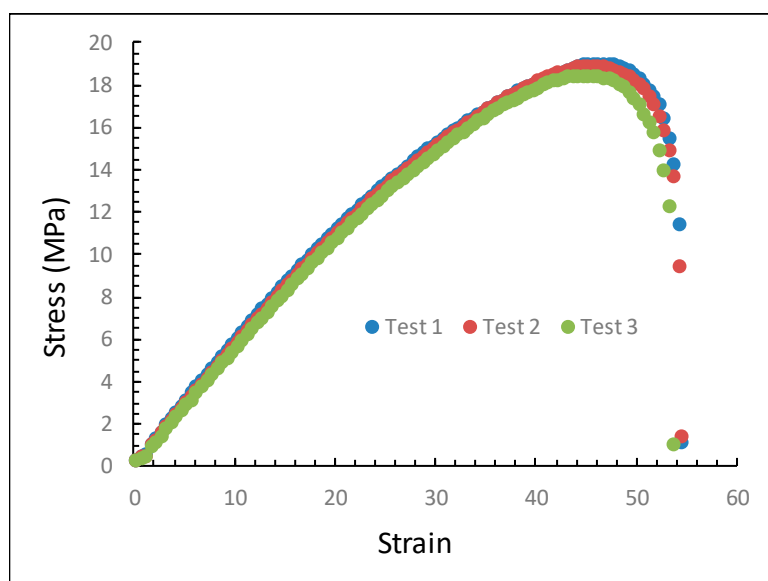

Figure S1. Example of Stress-Strain curves of an original BRC.
